# Supplementary material for: From unusual suspect to serial killer: Cyanotoxins boosted by climate change may jeopardize megafauna
Source: PubMed Central journal article supplement — Innovation (Camb). 2021 Feb 11;2(2):100092. doi: 10.1016/j.xinn.2021.100092 (PMC8454612; doi:10.1016/j.xinn.2021.100092), 2021-02-11
Supplement: mmc1.pdf [file mmc1.pdf]

**The Innovation, Volume 2**

## **Supplemental Information**

**From unusual suspect to serial**

**killer: Cyanotoxins boosted by climate**

**change may jeopardize megafauna**

**Haijun Wang, Chi Xu, Ying Liu, Erik Jeppesen, Jens-Christian Svenning, Jianguo Wu, Wenxia Zhang, Tianjun Zhou, Puze Wang, Shingirai Nangombe, Jinge Ma, Hongtao Duan, Jingyun Fang, and Ping Xie**

## **Methods for climatic data processing and analyses**

To investigate the climatic conditions associated with cyanobacterial blooms, temperature and precipitation records are examined. To account for potential observational uncertainty, multiple observational datasets are used. Global monthly temperature datasets used include: (1) GISS (NASA Goddard Institute for Space Studies; 2°X2°) and (2) BEST (Berkeley Earth Surface Temperature); 1°X1°. <sup>1,2</sup> Global monthly precipitation observation is from the GPCP (Global Precipitation Climatology Project); 2.5°X2.5°. <sup>3</sup> Monthly precipitation and evaporation data from the ERA5 reanalysis (0.25°X0.25°) are also used. <sup>4</sup>

Accumulated temperature for cyanobacteria is defined as follows <sup>5,6</sup>:

$$K = N(T - C)$$

where  $K$  is the accumulated temperature,  $C$  is the temperature threshold above which cyanobacteria recruit ( $C=9^{\circ}\text{C}$ ),  $N$  is the length of the cyanobacterial growing period (i.e. when  $T>C$ ), and  $T$  is the mean temperature over the growing period. In this study, annual accumulated temperature is computed from preceding June to May (in  $^{\circ}\text{C}$  days).

Likewise, the annual accumulated net precipitation is calculated from preceding June to May (in mm), which represents the availability of surface water. Here net precipitation (i.e. precipitation minus evaporation) is used so that the enhanced evaporation accompanying hot conditions is taken into account.

The temperature and precipitation records from different datasets consistently reveal the anomalous hot and dry conditions during 2019-2020 in Botswana and Zimbabwe (figure not shown). Thus, only the results from the GISS and ERA5 datasets are provided in the manuscript for brevity.

## **Methods for remote sensing analyses**

NDWI (Normalized Difference Water Index) was calculated according to REF<sup>7</sup>:

$$\text{NDWI} = (\text{GREEN} - \text{NIR}) / (\text{GREEN} + \text{NIR})$$

where GREEN and NIR represent green band and near infrared band of MSI and OLI. And pixels with NDWI greater than 0 are defined as constant water body.

FAI (Floating Algae Index) was calculated according to REF<sup>8</sup>:

$$\text{FAI} = \text{RED} - \text{NIR}'$$

$$\text{NIR}' = \text{RED} + [(\text{SWIR} - \text{RED}) * [(\lambda(\text{NIR}) - \lambda(\text{RED})) / (\lambda(\text{SWIR}) - \lambda(\text{RED}))]]$$

where RED, SWIR and NIR represent red band, near infrared band and shortwave infrared band of MSI and OLI.  $\lambda(\text{RED})$ ,  $\lambda(\text{NIR})$  and  $\lambda(\text{SWIR})$  represent the center wavelength of red band, near infrared band and shortwave infrared band of MSI and OLI.

## **Methods for Figure 1 D**

Response curve of growth rate of cyanobacteria to temperature was modified from REF<sup>9</sup>; Data on elephant density were collected from REF,<sup>10</sup> and data on mammal species richness were compiled based on their distribution range maps from the African Mammal Databank.

## **Text S1 Potential leading causes underlying the mysterious mass mortality.**

### **Ruled-out causes**

- 1 Poaching for ivory – carcasses intact.
- 2 Sabotage by farmers (nine commonly used pesticides) – lab test.
- 3 Starvation or dehydration – found in an area with an abundance of woodlands, 70% near waterholes and ponds.
- 4 Anthrax poisoning – differing from its selective effects on old and young individuals, carcasses of all ages found.

### **Possible causes**

- 1 Cyanotoxins
  - Lab test (posted by Botswana Department of Wildlife and National Parks) (*1*).
  - Carcasses found in/near waterholes or ponds with heavy scum of cyanobacteria.
  - Massive hemorrhage.
  - Walk in circles and appear dizzy before suddenly dropping dead (sometimes face-first), typical neurological symptoms of (*2,3*).
- 2 Encephalomyocarditis virus (hemorrhagic septicemia, a rodent-borne virus infection)
  - Neurological symptoms.
  - Massive hemorrhage.

### **Related media reports:**

1. Weston, P. 2020 Botswana says it has solved the mystery of mass elephant die-off. <https://www.theguardian.com/environment/2020/sep/21/Botswana-says-it-has-solved-mystery-of-mass-elephant-die-off-age-of-extinction-aoe>
2. Boulton, V. 2020. Hundreds of elephants are mysteriously dying in Botswana – a conservationist explains what we know. July 3, 2020. <https://theconversation.com/hundreds-of-elephants-are-mysteriously-dying-in-Botswana-a-conservationist-explains-what-we-know-142004>
3. Maron, D. F. 2020. What's killing Botswana's elephants? Here are the top theories. <https://www.nationalgeographic.com/animals/2020/07/botswana-elephant-death-mystery/>

URL link for photos showing dead elephants in the Okavango Delta.

<https://www.reuters.com/article/us-botswana-elephants-idUSKCN24N2JK>

## **Text S2 Concepts of cyanobacteria, cyanotoxin, and eutrophication.**

### **Cyanobacteria**

Cyanobacteria, also known as blue-green algae, are oxygen-producing bacteria and the Earth's oldest (~ 3.5 bya) organisms, with a major shaping effect on the origin of our modern-day biosphere through oxidization of the Earth's atmosphere.<sup>11</sup>

Cyanobacteria occur throughout the world, especially in calm water rich in nutrients. Cyanobacteria can form dense blooms under nutrient-rich conditions, resulting in increased turbidity, smothering of submersed macrophytes, and oxygen depletion followed by massive deaths of fish and sensitive macroinvertebrates. Cyanobacteria can interfere with the recreational function of waters and their use for drinking water purposes by their generation of obnoxious taste and odor compounds. Cyanobacteria can also produce a variety of toxins, called cyanotoxins, which are detrimental and even lethal to birds, mammals and humans.<sup>12</sup> Cyanobacteria are particularly abundant in nutrient-rich and hot environments such as southeastern Africa.<sup>13,14</sup>

### **Cyanotoxins**

Cyanotoxins can be classified into various types according to their modes of action and target cells and organs: hepatotoxins (the most frequently encountered), neurotoxins, dermatotoxins, and cytotoxins.<sup>12,15</sup> The symptoms of cyanotoxin poisoning include skin irritation, stomach aches, vomiting, nausea, diarrhea, fever, sore throat, and headache. The largest group of cyanotoxins is the cyclic heptapeptide hepatotoxins called microcystins (MCs), in which MC-LR is the best known and most toxic structural variant.<sup>16</sup> Microcystins predominantly cause liver injury.<sup>17,18</sup> An acute, lethal dose exposure can result in almost total breakdown of the tissue architecture and blood accumulation in the liver, where blood loss from the circulation causes death to the animal. Besides hepatotoxicity and tumor promotion, MCs may also induce neurotoxicity, reproductive toxicity, genotoxicity, and potential carcinogenicity.<sup>19-22</sup> Despite their aquatic origin, most cyanotoxins tend to be more hazardous to terrestrial mammals than to aquatic biota.<sup>23</sup> Furthermore, the proportion of toxic species or strain and release of toxins tend to increase with global warming.<sup>24,25</sup>

### **Eutrophication**

Eutrophication is an enrichment process in aquatic ecosystems created by excessive loading of nutrients (e.g. nitrogen and phosphorus), which promotes massive growth of phytoplankton, including cyanobacteria. A shift from a macrophyte-dominated state to a phytoplankton-dominated state will happen when nutrient loading surpasses a critical level.<sup>26,27</sup> Human activities are a common cause of eutrophication, with both point-source and non-point-source discharges accelerating the rate at which nutrients enter ecosystems. In parts of Africa, wild mammals such as hippos contribute significantly to the nutrient loading of freshwater ecosystems by moving nutrients from terrestrial to aquatic ecosystems, and by foraging on land, whereas much non-feeding time is spent in water.<sup>28</sup> Therefore, savanna waters can become highly eutrophic also without the influence of human activities.

## **Text S3 Derivation of the tolerable daily intake and half lethal dose of microcystin for African savanna elephant**

### **Provisional guideline of cyanotoxins by World Health Organization (WHO)**

In order to set safe levels of cyanotoxins, extensive experimental studies on their toxicity have been carried out. Microcystin-LR (MC-LR), the most frequently occurring and most toxic form, is also the most studied. As direct assessment of the risk of cyanotoxin exposure to humans is not feasible, animal studies have been conducted to address the issue. Among these, a 13-week study of mice exposed to pure MC-LR (by gavage) was considered suitable for deriving a guideline value for MC-LR.<sup>29</sup> Based on liver histopathology and serum enzyme level changes, a NOAEL (No Observed Adverse Effect Level) of  $40 \mu\text{g kg}^{-1} \text{ bw day}^{-1}$  was determined. By applying a total uncertainty factor of 1,000, a provisional TDI (Tolerable Daily Intake) of  $0.04 \mu\text{g kg}^{-1} \text{ bw day}^{-1}$  was established as the guideline of safe level.<sup>23</sup> A level of  $1.0 \mu\text{g L}^{-1}$  was then adopted as the provisional guideline based on an average adult body weight of 60 kg and an average water intake for adults of 2 liters per day. For acute exposures, a half lethal dose (LD50) of  $5 \text{ mg kg}^{-1} \text{ bw}$ , administered by gavage, is commonly accepted based on tests on one mouse strain.<sup>29</sup>

### **TDI and LD50 for African savanna elephants**

We derived TDI and LD50 for African savanna elephant (*Loxodonta africana*) as follows, based on an average elephant (5000 kg in body weight, 200 L water ingestion per day)<sup>30</sup>:

$$\text{TDI}_{L.africana}$$

$$= \text{TDI}_{\text{WHO2011}} * \text{bw}_{L.africana} / \text{Water ingestion}$$

$$= 0.04 \mu\text{g kg}^{-1} \text{ bw day}^{-1} * 5000 \text{ kg} / 200 \text{ L}$$

$$= 1.0 \mu\text{g L}^{-1} \text{ d}^{-1}$$

$$\text{LD50}_{L.africana}$$

$$= \text{LD50}_{\text{WHO2011}} * \text{bw}_{L.africana} / \text{Water ingestion}$$

$$= 5 \text{ mg kg}^{-1} * 5000 \text{ kg} / 200 \text{ L}$$

$$= 125 \text{ mg L}$$

**Table S1. Historic events of cyanotoxin-caused animal mortality**

| Year      | Country      | Location                           | Cyanobacteria species                         | Toxin                     | Impacts reported                                           |           | Reference number |
|-----------|--------------|------------------------------------|-----------------------------------------------|---------------------------|------------------------------------------------------------|-----------|------------------|
|           |              |                                    |                                               |                           | Death                                                      | Illness   |                  |
| 1913-1943 | South Africa | Free State and Southeast Transvaal | <i>Microcystis aeruginosa</i>                 | microcystin               | thousands of livestock (horses, sheep, cattle and rabbits) |           | 31               |
| 1942      | South Africa | Vaal Dam                           | <i>Microcystis</i> sp.                        | microcystin               | thousands of cattle and sheep                              |           | 32,33            |
| 1973-1974 | South Africa | Hartbeespoort Dam                  | <i>M. aeruginosa</i>                          | microcystin               | cattle                                                     |           | 34               |
| 1979      | South Africa | Klipvoor Dam                       | <i>M. aeruginosa</i>                          | microcystin               | 3 white rhinoceroses                                       |           | 35               |
| 1980      | South Africa | Vaal Dam                           | <i>M. aeruginosa</i>                          | microcystin               | cattle                                                     |           | 31               |
| 1984      | South Africa | William Pretorius Game Reserve     | <i>M. aeruginosa</i>                          | microcystin               | several black wildebeests                                  |           | 35               |
| 1987      | South Africa | Eastern Transvaal                  | <i>M. aeruginosa</i>                          | microcystin               | 47 cattle                                                  |           | 36               |
| 1989      | South Africa | Reservoir Bloemhof Dam             | <i>M. aeruginosa</i>                          | microcystin               | 7 giraffes                                                 |           | 37               |
| 1989      | South Africa | Reservoir Klipdrif Dam             | <i>M. aeruginosa</i>                          | microcystin               | livestock                                                  | livestock | 38               |
| 1993      | South Africa | Malmesbury                         | <i>Nodularia spumigena</i>                    | nodularin                 | 3 cattle                                                   | 10 cattle | 39               |
| 1994      | South Africa | Lake Zeekoevlei                    | <i>N. spumigena</i> ,<br><i>M. aeruginosa</i> | nodularin,<br>microcystin | dog (bull terrier bitch)                                   |           | 39,40            |
| 1994      | South Africa | Malmesbury                         | <i>N. spumigena</i>                           | nodularin                 | 34 cattle                                                  |           | 39               |
| 1994      | South Africa | Paarl                              | <i>M. aeruginosa</i>                          | microcystin               | 11 sheep                                                   | 30 sheep  | 39               |
| 1996      | South Africa | Kareedouw                          | <i>Oscillatoria</i> sp.                       | microcystin               | 290 dairy cows                                             | 70 stock  | 41               |
| 1998      | South Africa | Erfenis Dam                        | <i>Anabaena</i> spp.                          | cyanotoxin                | livestock                                                  |           | 31,42            |

|      |              |                                                                       |                                                                                                                       |                       |                                                                                                                              |              |          |
|------|--------------|-----------------------------------------------------------------------|-----------------------------------------------------------------------------------------------------------------------|-----------------------|------------------------------------------------------------------------------------------------------------------------------|--------------|----------|
| 2000 | South Africa | Orange River system downstream of the confluence with the Harts River | <i>Cylindrospermopsis raciborski</i><br><i>Anabaena</i> sp.,<br><i>Oscillatoria</i> sp.                               | not available         | fish                                                                                                                         |              | 41,43    |
| 2001 | Kenya        | Lake Bogoria                                                          | <i>Phormidium terebriformis</i> , <i>O. willei</i> , <i>Spirulina subsalsa</i> ,<br><i>Synechococcus bigranulatus</i> | microcystin, anatoxin | mass lesser flamingos                                                                                                        |              | 44       |
| 2005 | South Africa | Nhlanganzwane Dam                                                     | <i>M. aeruginosa</i>                                                                                                  | microcystin           | 7 white rhinoceroses, 2 lions, 2 cheetahs, 9 zebras, 23 wildebeest, 1 hippopotamus, 1 giraffe, 5 buffalos, 1 warthog, 1 Kudu |              | 45       |
| 2007 | South Africa | Nhlanganzwane Dam <sup>a</sup>                                        | <i>M. aeruginosa</i>                                                                                                  | microcystin           | 15 white rhinoceroses, 10 zebras, 10 blue wildebeests                                                                        | wild animals | 43,45,46 |
| 2007 | South Africa | Sunset Dam                                                            | <i>M. aeruginosa</i>                                                                                                  | microcystin           | 1 white rhinoceros, 6 impalas                                                                                                |              | 46       |
| 2008 | South Africa | Lake Loskop Dam                                                       | <i>M. aeruginosa</i> ,<br><i>M. flos-aquae</i>                                                                        | microcystin           | fish                                                                                                                         |              | 47       |
| 2008 | South Africa | Shilolweni Dam                                                        | <i>Microcystis</i> sp.                                                                                                | microcystin           | 70 wild animals (zebras, wildebeest, impalas, white rhinoceroses)                                                            |              | 45       |
| 2008 | Botswana     | Tuli block                                                            | <i>Oscillatoria</i> sp.                                                                                               | microcystin           | 70 bushbucks and impalas                                                                                                     |              | 43       |
| 2010 | South Africa | Shilolweni Dam                                                        | <i>Microcystis</i> sp.                                                                                                | microcystin           | 17 zebras, 7 wildebeests, 3 white rhinoceroses                                                                               |              | 45       |

**Table S2. List of published concentrations of microcystins (MCs) /manuscripts on African waters, with calculation of daily intake by African savanna elephant per body weight based on an average individual.**

| Code | Zone     | Country                 | Waters                     | MCs, $\mu\text{g/L}$ | Daily intake by African elephant per body weight (MCs*200L/5000 kg), $\mu\text{g kg}^{-1}\text{bw}$ | Reference number |
|------|----------|-------------------------|----------------------------|----------------------|-----------------------------------------------------------------------------------------------------|------------------|
| 1    | Northern | Algeria                 | Ain Zada Dam               | 69.3                 | 2.8                                                                                                 | 48               |
| 2    | Northern | Algeria                 | Cheffia Dam                | 28.9                 | 1.2                                                                                                 | 49               |
| 3    | Northern | Algeria                 | Lake Oubcim                | 46.2                 | 1.8                                                                                                 | 14               |
| 4    | Northern | Egypt                   | Nile River                 | 7.1                  | 0.3                                                                                                 | 50               |
| 5    | Northern | Morocco                 | Lake Lalla Takerkoust      | 19.9                 | 0.8                                                                                                 | 14               |
| 6    | Western  | Ghana                   | Kpong Dam                  | 0.03                 | 0.001                                                                                               | 51               |
| 7    | Western  | Ghana                   | Weija Dam                  | 3.21                 | 0.1                                                                                                 | 51               |
| 8    | Western  | Nigeria                 | Zaria aquaculture ponds    | 6.34                 | 0.3                                                                                                 | 14               |
| 9    | Eastern  | Ethiopia                | Lake Chamo                 | 28.9                 | 1.2                                                                                                 | 14               |
| 10   | Eastern  | Ethiopia                | Lake Chamo                 | 6.1                  | 0.2                                                                                                 | 52               |
| 11   | Eastern  | Ethiopia                | Lake Koka                  | 3.9                  | 0.2                                                                                                 | 14               |
| 12   | Eastern  | Ethiopia                | Lake Koka                  | 51                   | 2.0                                                                                                 | 52               |
| 13   | Eastern  | Ethiopia                | Lake Langano               | 1.3                  | 0.1                                                                                                 | 52               |
| 14   | Eastern  | Ethiopia                | Lake Ziway                 | 1.3                  | 0.1                                                                                                 | 52               |
| 15   | Eastern  | Kenya                   | Lake Simbi                 | 29163                | 1167                                                                                                | 53               |
| 16   | Eastern  | Kenya                   | Lake Sonachi               | 64.8                 | 2.6                                                                                                 | 53               |
| 17   | Eastern  | Kenya                   | Lake Victoria, Nyanza Gulf | 0.4                  | 0.02                                                                                                | 54               |
| 18   | Eastern  | Kenya                   | Nakuru oxidation ponds     | 1.72                 | 0.1                                                                                                 | 14               |
| 19   | Eastern  | Kenya                   | Nyanza Gulf                | 82.5                 | 3.3                                                                                                 | 14               |
| 20   | Eastern  | Kenya, Tanzania, Uganda | Lake Victoria              | 1                    | 0.04                                                                                                | 55               |
| 21   | Eastern  | Uganda                  | Lake Saka                  | 31783                | 1271                                                                                                | 14               |



|    |          |              |                           |        |       |    |
|----|----------|--------------|---------------------------|--------|-------|----|
| 22 | Eastern  | Uganda       | Murchison Bay             | 3.1    | 0.1   | 14 |
| 23 | Southern | Mozambique   | Maputo and Gaza provinces | 7.31   | 0.3   | 13 |
| 24 | Southern | South Africa | Hartbeespoort Dam         | 580    | 23.2  | 56 |
| 25 | Southern | South Africa | Hartbeespoort Dam         | 1965   | 78.6  | 41 |
| 26 | Southern | South Africa | Hartbeespoort Dam         | 1861   | 74.4  | 41 |
| 27 | Southern | South Africa | Hartbeespoort Dam         | 1698   | 67.9  | 41 |
| 28 | Southern | South Africa | Hartbeespoort Dam         | 414    | 16.6  | 41 |
| 29 | Southern | South Africa | Hartbeespoort Dam         | 1538   | 61.5  | 41 |
| 30 | Southern | South Africa | Hartbeespoort Dam         | 1314   | 52.6  | 41 |
| 31 | Southern | South Africa | Hartbeespoort Dam         | 474    | 19.0  | 41 |
| 32 | Southern | South Africa | Hartbeespoort Dam         | 4.65   | 0.2   | 57 |
| 33 | Southern | South Africa | Hartbeespoort Dam         | 12300  | 492   | 58 |
| 34 | Southern | South Africa | Hartbeespoort Dam         | 44878  | 1795  | 59 |
| 35 | Southern | South Africa | Klipvoor Dam              | 22330  | 893   | 41 |
| 36 | Southern | South Africa | Klipvoor Dam              | 21100  | 844   | 41 |
| 37 | Southern | South Africa | Loskop Dam                | 0.36   | 0.01  | 14 |
| 38 | Southern | South Africa | Loskop Dam                | 0.09   | 0.004 | 14 |
| 39 | Southern | South Africa | Loskop Dam                | 3.173  | 0.1   | 60 |
| 40 | Southern | South Africa | Makhohlola Dam            | 0.2    | 0.01  | 46 |
| 41 | Southern | South Africa | Makhohlolo Dam            | 3.38   | 0.1   | 14 |
| 42 | Southern | South Africa | Mpanamana Dam             | 1      | 0.04  | 46 |
| 43 | Southern | South Africa | Nhlanganzwane Dam         | 24951  | 998   | 14 |
| 44 | Southern | South Africa | Nhlanganzwane Dam         | 103160 | 4126  | 46 |
| 45 | Southern | South Africa | Nhlanganzwane Dam         | 23720  | 949   | 47 |
| 46 | Southern | South Africa | Rietvlei Dam              | 198    | 7.9   | 41 |
| 47 | Southern | South Africa | Rietvlei Dam              | 184    | 7.4   | 41 |
| 48 | Southern | South Africa | Roodeplaat Dam            | 981    | 39.2  | 41 |
| 49 | Southern | South Africa | Sunset Dam                | 124460 | 4978  | 46 |

|         |                 |              |              |       |      |    |
|---------|-----------------|--------------|--------------|-------|------|----|
| 50      | Southern        | South Africa | Sunset Dam   | 1110  | 44.4 | 46 |
| 51      | Southern        | Zimbabwe     | Lake Chivero | 19.86 | 0.8  | 61 |
| Average | Northern Africa |              |              | 34.28 |      |    |
|         | Western Africa  |              |              | 3.19  |      |    |
|         | Eastern Africa  |              |              | 4371  |      |    |
|         | Southern Africa |              |              | 13423 |      |    |

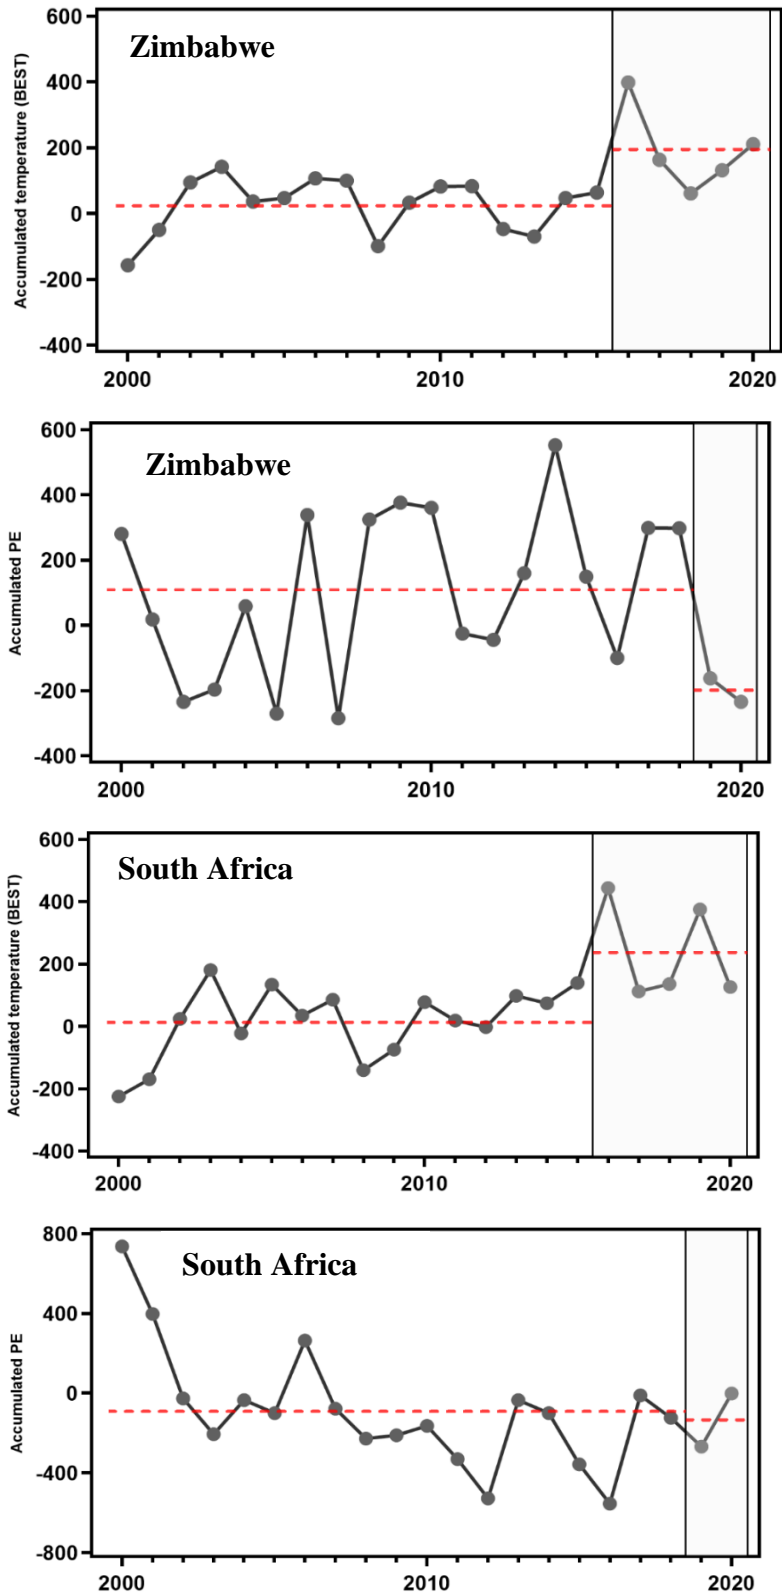

**Fig. S1.** Anomalies (against the 1986-2005 baseline climatology) of accumulated (from preceding June to May) temperature ( $^{\circ}\text{C}$  days) and net precipitation (precipitation minus evaporation, mm) during 2000-2020 in Zimbabwe and South Africa

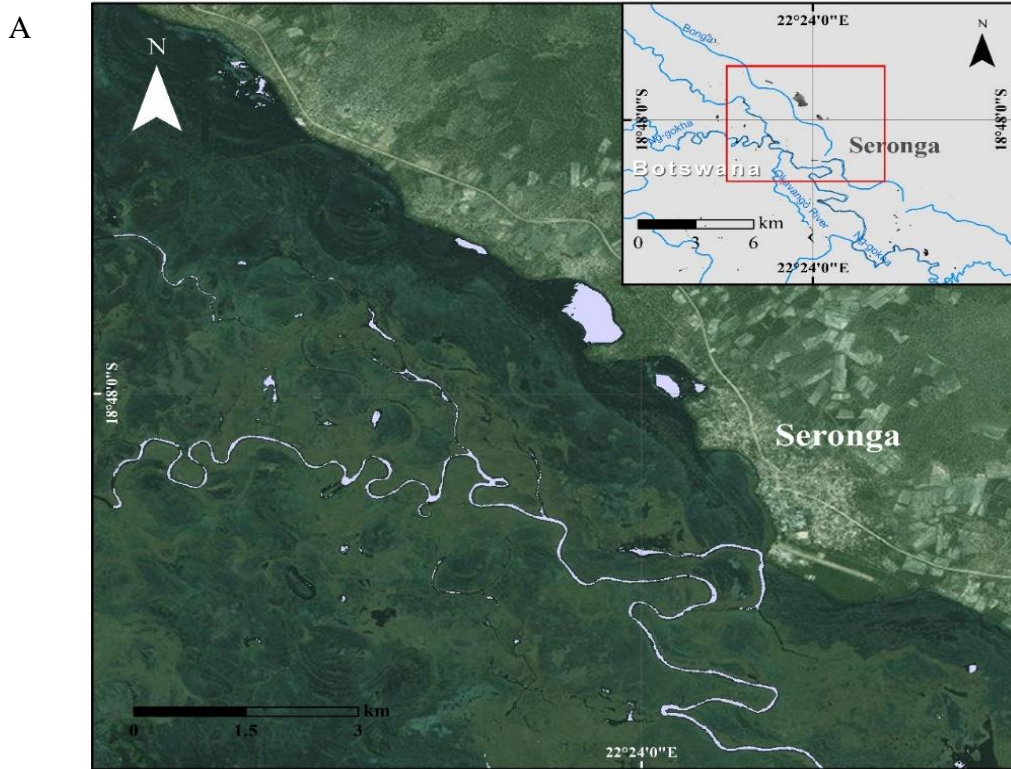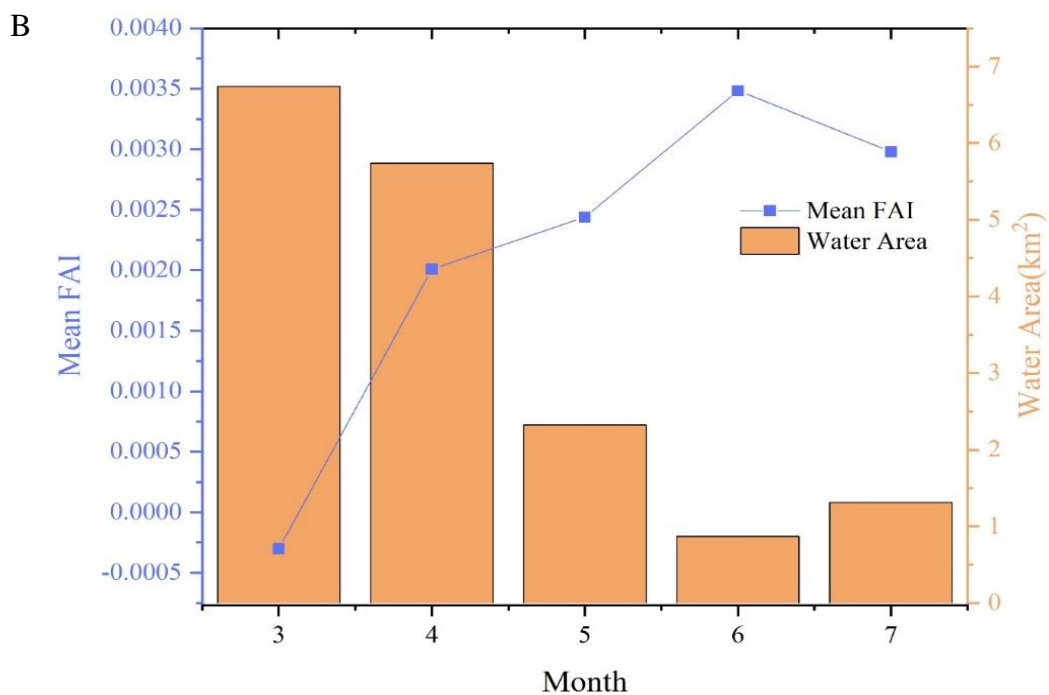

**Fig. S2.** The zone (framed) where most elephant mortality events took place (north-west of Seronga, Okavango Delta, Botswana) and for which the remote sensing analyses were performed (A) and changes in water area and floating algae index (FAI) in the framed area during the period of elephant death (March-July, 2020). The constant water extent area was extracted by NDWI with Sentinel-2/MSI images during the period of elephant death. Changes in water area and floating algae index (FAI) in the framed area were obtained Sentinel-2/MSI and Landsat-8/OLI with at the same time.

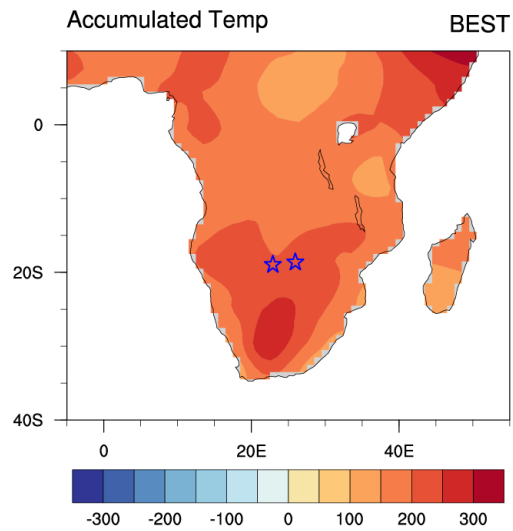

**A.** Annual accumulated effective temperature (from preceding June to May; °C days) during 2015-2020 relative to the 1986-2005 baseline climatology from the BEST data. Stars denote Botswana (18.84S, 22.90E) and Zimbabwe (18.51S, 25.95E).

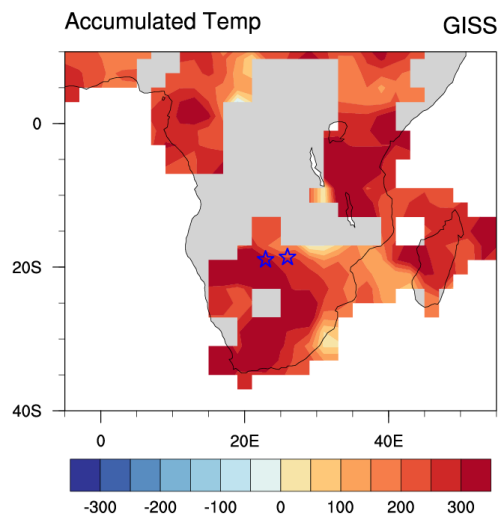

**B.** Same as A but for temperature derived from the GISS data.

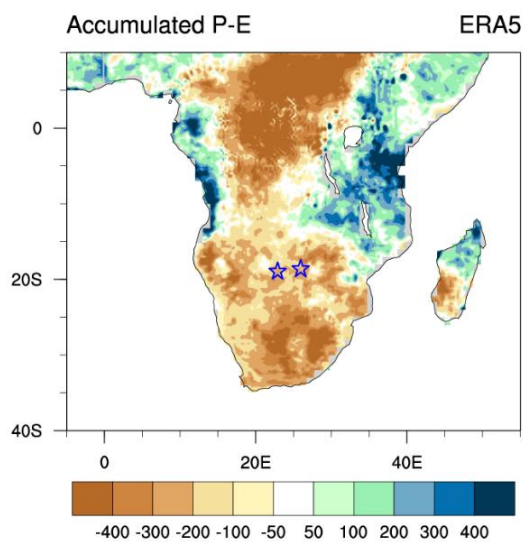

**C.** Same as A but for annual accumulated net precipitation (precipitation minus evaporation, mm) during 2019-2020 derived from the ERA5 data.

**Fig. S3.** Spatial distribution of extreme hot and dry climatic conditions associated with the deaths of African savanna elephants in 2020.

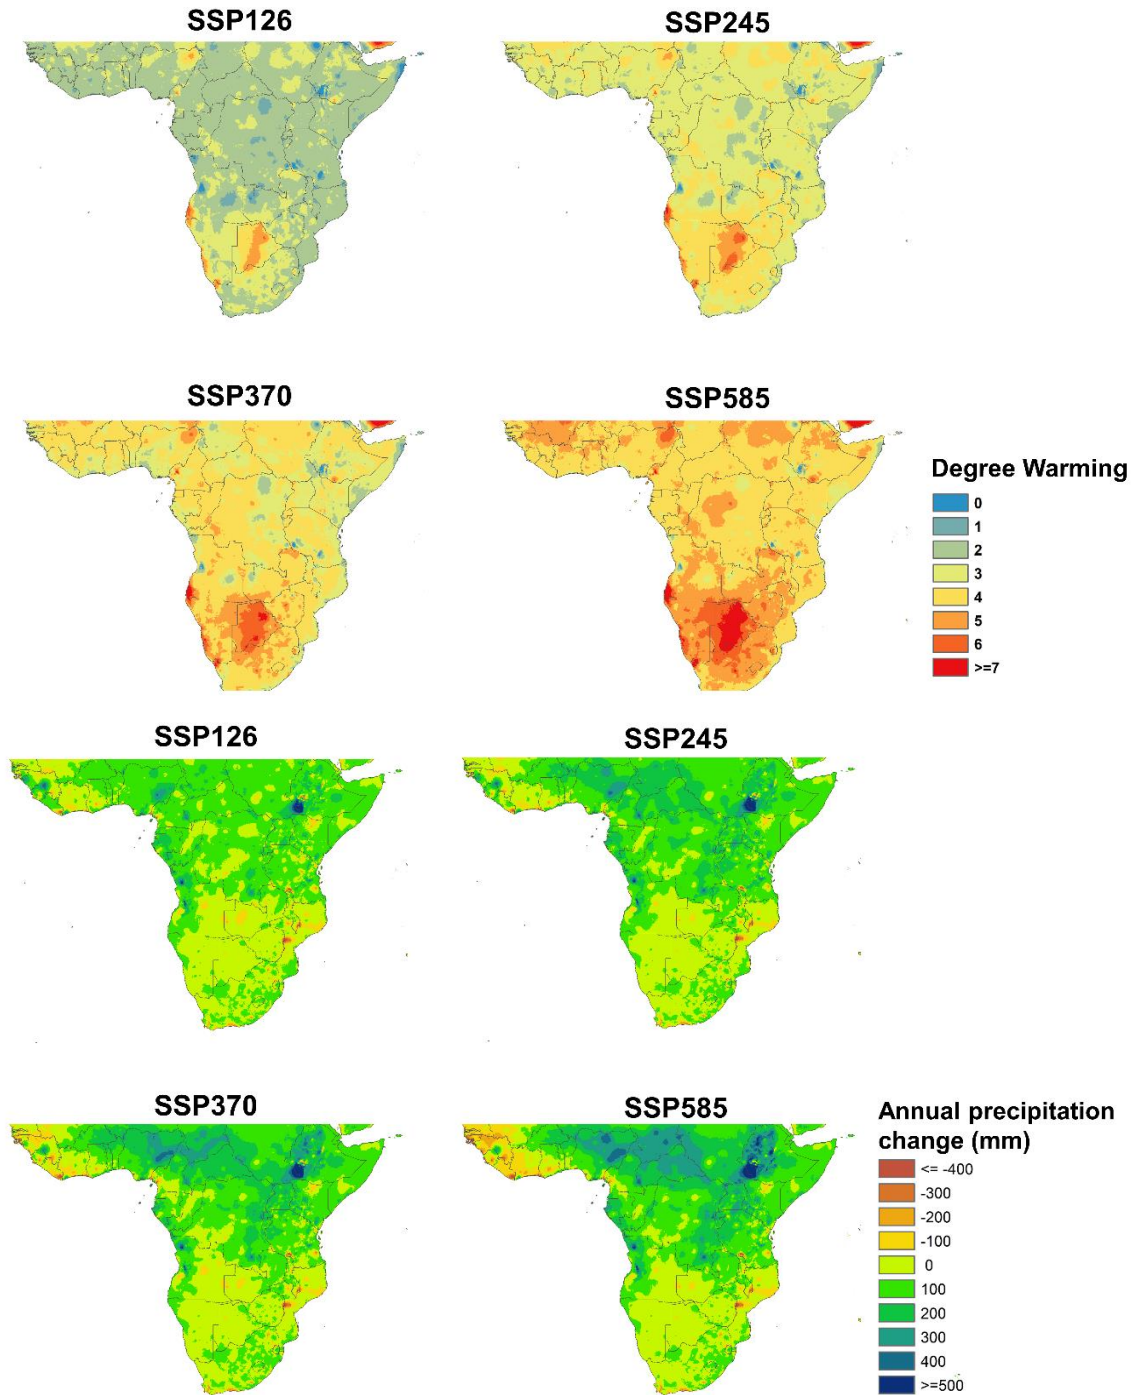

**Fig. S4.** Changes in mean annual temperature and precipitation around 2070, with southern Africa identified as a hotspot of climate warming and drying. The mean annual temperature and precipitation data projected for the time period of 2061-2080 are available from 9 CMIP6 global climate models (BCC-CSM2-MR, CNRM-CM6-1, CNRM-ESM2-1, CanESM5, GFDL-ESM4, IPSL-CM6A-LR, MIROC-ES2L, MIROC6, MRI-ESM2-0) for 4 Shared Socio-economic Pathways (SSP126, 245, 370 and 585). WorldClim v2.1 data is used as the current baseline. The climate data with a spatial resolution of ~10 km is downloaded from the WorldClim website.

## References

1. Hansen, J., Ruedy, R., Sato, M., and Lo, K. (2010). Current GISS global surface temperature analysis. *NASA Goddard Inst. Space Stud. N. Y.*, 1–34.
2. Rohde, R., Muller, R.A., Jacobsen, R., Muller, E., Perlmutter, S., Rosenfeld, A., Wurtele, J., Groom, D., and Wickham, C. (2013). A New Estimate of the Average Earth Surface Land Temperature Spanning 1753 to 2011, *Geoinfor Geostat: An Overview 1: 1. of 7, 2.*
3. Adler, R.F., Huffman, G.J., Chang, A., Ferraro, R., Xie, P.-P., Janowiak, J., Rudolf, B., Schneider, U., Curtis, S., Bolvin, D., et al. (2003). The Version-2 Global Precipitation Climatology Project (GPCP) Monthly Precipitation Analysis (1979–Present). *J. Hydrometeorol.* 4, 1147–1167.
4. Hersbach, H., Bell, B., Berrisford, P., Hirahara, S., Horányi, A., Muñoz - Sabater, J., Nicolas, J., Peubey, C., Radu, R., Schepers, D., et al. (2020). The ERA5 global reanalysis. *Q. J. R. Meteorol. Soc.* 146, 1999–2049.
5. Cao, H.-S., Kong, F.-X., Tan, J.-K., Zhang, X.-F., Tao, Y., and Yang, Z. (2005). Recruitment of Total Phytoplankton, Chlorophytes and Cyanobacteria from Lake Sediments Recorded by Photosynthetic Pigments in a Large, Shallow Lake (Lake Taihu, China). *Int. Rev. Hydrobiol.* 90, 347–357.
6. Cao, H.-S., Tao, Y., Kong, F.-X., and Yang, Z. (2008). Relationship between Temperature and Cyanobacterial Recruitment from Sediments in Laboratory and Field Studies. *J. Freshw. Ecol.* 23, 405–412.
7. McFEETERS, S.K. (1996). The use of the Normalized Difference Water Index (NDWI) in the delineation of open water features. *Int. J. Remote Sens.* 17, 1425–1432.
8. Hu, C. (2009). A novel ocean color index to detect floating algae in the global oceans. *Remote Sens. Environ.* 113, 2118–2129.
9. Paerl, H.W., and Otten, T.G. (2013). Harmful Cyanobacterial Blooms: Causes, Consequences, and Controls. *Microb. Ecol.* 65, 995–1010.
10. Chase, M.J., Schlossberg, S., Griffin, C.R., Bouché, P.J.C., Djene, S.W., Elkan, P.W., Ferreira, S., Grossman, F., Kohi, E.M., Landen, K., et al. (2016). Continent-wide survey reveals massive decline in African savannah elephants. *PeerJ* 4, e2354.
11. Huisman, J., Codd, G.A., Paerl, H.W., Ibelings, B.W., Verspagen, J.M.H., and Visser, P.M. (2018). Cyanobacterial blooms. *Nat. Rev. Microbiol.* 16, 471–483.
12. Xie, P. (2006). *Microcystins in aquatic animals with potential risk to human health* (Scientific Press, Beijing).
13. Tamele, I.J., and Vasconcelos, V. (2020). Microcystin Incidence in the Drinking Water of Mozambique: Challenges for Public Health Protection. *Toxins* 12, 368.
14. Ndlela, L.L., Oberholster, P.J., Van Wyk, J.H., and Cheng, P.H. (2016). An overview of cyanobacterial bloom occurrences and research in Africa over the last decade. *Harmful Algae* 60, 11–26.
15. Falconer, I.R. (1999). An Overview of problems caused by toxic blue–green algae (cyanobacteria) in drinking and recreational water. *Environ. Toxicol.* 14, 5–12.
16. Qi, Y., Rosso, L., Sedan, D., Giannuzzi, L., Andrinolo, D., and Volmer, D.A. (2015). Seven new microcystin variants discovered from a native *Microcystis aeruginosa* strain – unambiguous assignment of product ions by tandem mass spectrometry. *Rapid Commun. Mass Spectrom.* 29, 220–224.

- 17.Chen, J., Xie, P., Li, L., and Xu, J. (2009). First Identification of the Hepatotoxic Microcystins in the Serum of a Chronically Exposed Human Population Together with Indication of Hepatocellular Damage. *Toxicol. Sci.* *108*, 81–89.
- 18.Falconer, I.R. (1991). Tumor promotion and liver injury caused by oral consumption of cyanobacteria. *Environ. Toxicol. Water Qual.* *6*, 177–184.
- 19.Liu, Y., Xie, P., Qiu, T., Li, H.-Y., Li, G.-Y., Hao, L., and Xiong, Q. (2010). Microcystin extracts induce ultrastructural damage and biochemical disturbance in male rabbit testis. *Environ. Toxicol.* *25*, 9–17.
- 20.Zhao, Y., Xie, P., and Fan, H. (2012). Genomic Profiling of MicroRNAs and Proteomics Reveals an Early Molecular Alteration Associated with Tumorigenesis Induced by MC-LR in Mice. *Environ. Sci. Technol.* *46*, 34–41.
- 21.Chen, L., Chen, J., Zhang, X., and Xie, P. (2016). A review of reproductive toxicity of microcystins. *J. Hazard. Mater.* *301*, 381–399.
- 22.Hu, Y., Chen, J., Fan, H., Xie, P., and He, J. (2016). A review of neurotoxicity of microcystins. *Environ. Sci. Pollut. Res.* *23*, 7211–7219.
- 23.World Health Organization ed. (2011). Guidelines for drinking-water quality 4th ed. (World Health Organization).
- 24.Walls, J.T., Wyatt, K.H., Doll, J.C., Rubenstein, E.M., and Rober, A.R. (2018). Hot and toxic: Temperature regulates microcystin release from cyanobacteria. *Sci. Total Environ.* *610–611*, 786–795.
- 25.Mantzouki, E., Lürling, M., Fastner, J., De Senerpont Domis, L., Wilk-Woźniak, E., Koreivienė, J., Seelen, L., Teurlinx, S., Verstijnen, Y., Krztoń, W., et al. (2018). Temperature Effects Explain Continental Scale Distribution of Cyanobacterial Toxins. *Toxins* *10*, 156.
- 26.Scheffer, M., and Jeppesen, E. (2007). Regime Shifts in Shallow Lakes. *Ecosystems* *10*, 1–3.
- 27.Wang, H.-J., Wang, H.-Z., Liang, X.-M., and Wu, S.-K. (2014). Total phosphorus thresholds for regime shifts are nearly equal in subtropical and temperate shallow lakes with moderate depths and areas. *Freshw. Biol.* *59*, 1659–1671.
- 28.Moss, B. (2015). Mammals, freshwater reference states, and the mitigation of climate change. *Freshw. Biol.* *60*, 1964–1976.
- 29.Fawell, J.K., James, C.P., and James, H.A. (1994). Toxins from blue-green algae: toxicological assessment of microcystin-LR and a method for its determination in water. *Water Res. Cent. Medmenham UK*, 1–46.
- 30.Sach, F., Dierenfeld, E.S., Langley-Evans, S.C., Hamilton, E., Murray Lark, R., Yon, L., and Watts, M.J. (2020). Potential bio-indicators for assessment of mineral status in elephants. *Sci. Rep.* *10*, 8032.
- 31.Oberholster, P.J., Botha, A.-M., and Cloete, T.E. (2005). An overview of toxic freshwater cyanobacteria in South Africa with special reference to risk, impact and detection by molecular marker tools. *Biokemistri* *17*, 57–71.
- 32.Stephens, E.L. (1949). *Microcystis Toxica* Sp. Nov.: A Poisonous Alga from the Transvaal and Orange Free State. *Trans. R. Soc. South Afr.* *32*, 105–112.
- 33.Steyn, D.G. (1945). Poisoning of animals by algae (scum or waterbloom) in dams and pans. *Trans Dept Agr Union Afr*, 1–9.



34. Toerien, D.F., Scott, W.E., and Pitout, M.J. (1976). Microcystis toxins: isolation, identification, implications. *Water Sa* 2, 160–162.
35. Soll, M.D.\* & W., M.C. \*\* (1985). Mortality of a white rhinoceros (*Ceratotherium simum*) suspected to be associated with the blue-green alga *Microcystis aeruginosa*. *J. S. Afr. Vet. Assoc.* 56, 49–51.
36. Scott, W.E. (1991). Occurrence and Significance of Toxic Cyanobacteria in Southern Africa. *Water Sci. Technol.* 23, 175–180.
37. Theron, C.P. (1990). Kameelperdvrektes en die teenwoordigheid van *Microcystis* in Bloemhof Dam. DWAF-HRI Rep. N 4.
38. Theron, C.P. (1990). 'n Ondersoek na die voorkoms van *Microcystis* in Klipdrif Dam. *Inst. Water Qual. Stud. Rep. N4841* Department Water. Recite from: Oberholster, P.J., Botha, A.-M., and Cloete, T.E. (2005). An overview of toxic freshwater cyanobacteria in South Africa with special reference to risk, impact and detection by molecular marker tools. *Biokemistri* 17, 57–71.
39. Van Halderen, A., Harding, W.R., Wessels, J.C., Schneider, D.J., Heine, E.W., Van der Merwe, J., and Fourie, J.M. (1995). Cyanobacterial (blue-green algae) poisoning of livestock in the western Cape Province of South Africa. *J. S. Afr. Vet. Assoc.* 66, 260–264.
40. G. A. Harding, W.R.\* (1995). Death of a dog attributed to the cyanobacterial (blue-green algal) hepatotoxin nodularin in South Africa. *J. S. Afr. Vet. Assoc.* 66, 256–259.
41. Harding, W.R., and Paxton, B.R. (2001). Cyanobacteria in South Africa: a review (Water Research Commission Pretoria).
42. Van Ginkel, C.E., and Hohls, B.C. (1999). Toxic algae in Erfenis and Allemanskraal dams. Occasional report by the Institute for Quality Studies, Department of Water Affairs and Forestry (N).
43. Oberholster, P.J., Botha, A.-M., and Myburgh, J.G. (2009). Linking climate change and progressive eutrophication to incidents of clustered animal mortalities in different geographical regions of South Africa. *Afr. J. Biotechnol.* 8.
44. Krienitz, L., Ballot, A., Kotut, K., Wiegand, C., Pütz, S., Metcalf, J.S., Codd, G.A., and Stephan, P. (2003). Contribution of hot spring cyanobacteria to the mysterious deaths of Lesser Flamingos at Lake Bogoria, Kenya. *FEMS Microbiol. Ecol.* 43, 141–148.
45. Bengis, R., Govender, D., Lane, E., Myburgh, J., Oberholster, P., Buss, P., Prozesky, L., and Keet, D. (2016). Eco-epidemiological and pathological features of wildlife mortality events related to cyanobacterial bio-intoxication in the Kruger National Park, South Africa. *J. S. Afr. Vet. Assoc.* 87, 1–9.
46. Masango, M.G., Myburgh, J.G., Labuschagne, L., Govender, D., Bengis, R.G., and Naicker, D. (2010). ASSESSMENT OF MICROCYSTIS BLOOM TOXICITY ASSOCIATED WITH WILDLIFE MORTALITY IN THE KRUGER NATIONAL PARK, SOUTH AFRICA. *J. Wildl. Dis.* 46, 95–102.
47. Oberholster, P.J., Myburgh, J.G., Govender, D., Bengis, R., and Botha, A.-M. (2009). Identification of toxigenic *Microcystis* strains after incidents of wild animal mortalities in the Kruger National Park, South Africa. *Ecotoxicol. Environ. Saf.* 72, 1177–1182.
48. Saoudi, A., Brient, L., Boucetta, S., Ouzrout, R., Bormans, M., and Bensouilah, M. (2017). Management of toxic cyanobacteria for drinking water production of Ain Zada Dam. *Environ. Monit. Assess.* 189, 361.

49. Nasri, H., Bouaïcha, N., and Harche, M.K. (2007). A new morphospecies of *Microcystis* sp. forming bloom in the Cheffia dam (Algeria): Seasonal variation of microcystin concentrations in raw water and their removal in a full-scale treatment plant. *Environ. Toxicol.* 22, 347–356.
50. Mohamed, Z.A., and Hussein, A.A. (2006). Depuration of microcystins in tilapia fish exposed to natural populations of toxic cyanobacteria: A laboratory study. *Ecotoxicol. Environ. Saf.* 63, 424–429.
51. Addico, G., Hardege, J., Komarek, J., Babica, P., and Graft-Johnson, K. de (2006). Cyanobacteria species identified in the Weija and Kpong reservoirs, Ghana, and their implications for drinking water quality with respect to microcystin. *Afr. J. Mar. Sci.* 28, 451–456.
52. Willén, E., Ahlgren, G., Tilahun, G., Spoof, L., Neffling, M.-R., and Meriluoto, J. (2011). Cyanotoxin production in seven Ethiopian Rift Valley lakes. *Inland Waters* 1, 81–91.
53. Ballot, A., Krienitz, L., Kotut, K., Wiegand, C., and Pflugmacher, S. (2005). Cyanobacteria and cyanobacterial toxins in the alkaline crater lakes Sonachi and Simbi, Kenya. *Harmful Algae* 4, 139–150.
54. Simiyu, B.M., Oduor, S.O., Rohrlack, T., Sitoki, L., and Kurmayer, R. (2018). Microcystin Content in Phytoplankton and in Small Fish from Eutrophic Nyanza Gulf, Lake Victoria, Kenya. *Toxins* 10, 275.
55. Olokotum, M., Mitroi, V., Troussellier, M., Semyalo, R., Bernard, C., Montuelle, B., Okello, W., Quiblier, C., and Humbert, J.-F. (2020). A review of the socioecological causes and consequences of cyanobacterial blooms in Lake Victoria. *Harmful Algae* 96, 101829.
56. Pindihama, G.K., and Gitari, M.W. (2020). Cyanobacterial toxins: an emerging threat in South African irrigation water. *Water Environ. J.* 34, 506–516.
57. Mokoena, M.M., Mukhola, M.S., and Okonkwo, O.J. (2016). Hazard Assessment of Microcystins from the Household's Drinking Water. *Appl. Ecol. Environ. Res.* 14, 695–710.
58. Oberholster, P.J., Cloete, T.E., van Ginkel, C., Botha, A.M., and Ashton, P.J. (2008). The use of remote sensing and molecular markers as early warning indicators of the development of cyanobacterial hyperscums crust and microcystin-producing genotypes in the hypertrophic Lake Hartebeespoort, South Africa. *Pretoria Counc. Sci. Ind. Res. CSIR.*
59. Masango, M., Myburgh, J., Botha, C., Labuschagne, L., and Naicker, D. (2008). A comparison of in vivo and in vitro assays to assess the toxicity of algal blooms. *Water Res.* 42, 3241–3248.
60. Nchabeleng, T., Cheng, P., Oberholster, P.J., Botha, A.-M., Smit, W.J., and Luus-Powell, W.J. (2014). Microcystin-LR equivalent concentrations in fish tissue during a postbloom *Microcystis* exposure in Loskop Dam, South Africa. *Afr. J. Aquat. Sci.* 39, 459–466.
61. Ndebele, M.R., and Magadza, C.H.D. (2006). The occurrence of microcystin-LR in Lake Chivero, Zimbabwe. *Lakes Reserv. Sci. Policy Manag. Sustain. Use* 11, 57–62.
